# Supplementary material
Source: publisher figshare collection journal article supplement (https://springernature.figshare.com/ndownloader/files/28435350)
Supplement: Supplementary file 1 [file 28435350]

datetime	id	power	voltage
1562102961	866131033548393	0	223
1562103021	866131033548393	0	226
1562103081	866131033548393	0	226
1562103141	866131033548393	0	226
1562103201	866131033548393	0	226
1562103261	866131033548393	0	226
1562103321	866131033548393	0	226
1562103381	866131033548393	0	227
1562103441	866131033548393	0	226
1562103501	866131033548393	0	226
1562103561	866131033548393	0	226
1562103621	866131033548393	0	227
1562103681	866131033548393	0	227
1562103741	866131033548393	0	227
1562103801	866131033548393	0	227
1562103861	866131033548393	0	226
1562103921	866131033548393	0	227
1562103981	866131033548393	0	227
1562104041	866131033548393	0	227
1562104101	866131033548393	0	227
1562104161	866131033548393	0	227
1562104221	866131033548393	0	227
1562104281	866131033548393	0	228
1562104341	866131033548393	0	228
1562104401	866131033548393	0	228
1562104461	866131033548393	0	228
1562104521	866131033548393	0	228
1562104581	866131033548393	0	228
1562104641	866131033548393	0	228
1562104701	866131033548393	0	228
1562104761	866131033548393	0	228
1562104821	866131033548393	0	228
1562104881	866131033548393	0	228
1562104941	866131033548393	0	228
1562105001	866131033548393	0	228
1562105061	866131033548393	0	228
1562105121	866131033548393	0	228
1562105181	866131033548393	0	228
1562105241	866131033548393	0	228
1562105301	866131033548393	0	228
1562105361	866131033548393	0	228
1562105421	866131033548393	0	228
1562105481	866131033548393	0	228
1562105541	866131033548393	0	228
1562105601	866131033548393	0	228
1562105661	866131033548393	0	228
1562105721	866131033548393	0	228
1562105781	866131033548393	0	227
1562105841	866131033548393	0	226
1562105901	866131033548393	0	226
1562105961	866131033548393	0	226
1562106021	866131033548393	0	226
1562106081	866131033548393	0	226
1562106141	866131033548393	0	226
1562106201	866131033548393	0	226
1562106261	866131033548393	0	226
1562106321	866131033548393	0	226
1562106381	866131033548393	0	227
1562106441	866131033548393	0	228
1562106501	866131033548393	0	228
1562106562	866131033548393	0	228
1562106622	866131033548393	0	228
1562106682	866131033548393	0	228
1562106742	866131033548393	0	228
1562106802	866131033548393	0	228
1562106862	866131033548393	0	228
1562106922	866131033548393	0	228
1562106982	866131033548393	0	228
1562107042	866131033548393	0	228
1562107102	866131033548393	0	228
1562107162	866131033548393	0	228
1562107222	866131033548393	0	228
1562107282	866131033548393	0	228
1562107342	866131033548393	0	228
1562107402	866131033548393	0	228
1562107462	866131033548393	0	228
1562107522	866131033548393	0	228
1562107582	866131033548393	0	228
1562107642	866131033548393	0	227
1562107702	866131033548393	0	227
1562107762	866131033548393	0	227
1562107822	866131033548393	0	228
1562107882	866131033548393	0	228
1562107942	866131033548393	0	227
1562108002	866131033548393	0	226
1562108062	866131033548393	0	226
1562108122	866131033548393	0	226
1562108182	866131033548393	0	226
1562108242	866131033548393	0	226
1562108302	866131033548393	0	226
1562108362	866131033548393	0	226
1562108422	866131033548393	0	226
1562108482	866131033548393	0	226
1562108542	866131033548393	0	227
1562108602	866131033548393	0	228
1562108662	866131033548393	0	228
1562108722	866131033548393	0	228
1562108782	866131033548393	0	228
1562108842	866131033548393	0	228
1562108902	866131033548393	0	228
1562108962	866131033548393	0	228
1562109022	866131033548393	0	228
1562109082	866131033548393	0	228
1562109142	866131033548393	0	228
1562109202	866131033548393	0	228
1562109262	866131033548393	0	227
1562109322	866131033548393	0	227
1562109382	866131033548393	0	228
1562109442	866131033548393	0	228
1562109503	866131033548393	0	228
1562109568	866131033548393	0	0
1562109628	866131033548393	0	225
1562109689	866131033548393	0	228
1562109749	866131033548393	0	227
1562109809	866131033548393	0	226
1562109869	866131033548393	0	226
1562109929	866131033548393	0	226
1562109989	866131033548393	0	226
1562110049	866131033548393	0	226
1562110109	866131033548393	0	226
1562110169	866131033548393	0	226
1562110229	866131033548393	0	226
1562110289	866131033548393	0	226
1562110349	866131033548393	0	226
1562110409	866131033548393	0	228
1562110469	866131033548393	0	228
1562110529	866131033548393	0	228
1562110589	866131033548393	0	227
1562110649	866131033548393	0	228
1562110709	866131033548393	0	228
1562110769	866131033548393	0	228
1562110829	866131033548393	0	227
1562110889	866131033548393	0	227
1562110949	866131033548393	0	228
1562111009	866131033548393	0	228
1562111069	866131033548393	0	228
1562111129	866131033548393	0	228
1562111189	866131033548393	0	228
1562111249	866131033548393	0	228
1562111309	866131033548393	0	228
1562111369	866131033548393	0	228
1562111429	866131033548393	0	228
1562111489	866131033548393	0	228
1562111549	866131033548393	0	228
1562111609	866131033548393	0	228
1562111669	866131033548393	0	228
1562111729	866131033548393	0	228
1562111789	866131033548393	0	228
1562111849	866131033548393	0	228
1562111909	866131033548393	0	228
1562111969	866131033548393	0	228
1562112029	866131033548393	0	228
1562112089	866131033548393	0	227
1562112149	866131033548393	0	226
1562112209	866131033548393	0	227
1562112269	866131033548393	0	227
1562112329	866131033548393	0	227
1562112389	866131033548393	0	227
1562112449	866131033548393	0	227
1562112509	866131033548393	0	227
1562112569	866131033548393	0	227
1562112629	866131033548393	0	227
1562112689	866131033548393	0	227
1562112749	866131033548393	0	228
1562112809	866131033548393	0	228
1562112869	866131033548393	0	228
1562112929	866131033548393	0	228
1562112989	866131033548393	0	228
1562113049	866131033548393	0	228
1562113109	866131033548393	0	228
1562113170	866131033548393	0	228
1562113230	866131033548393	0	228
1562113290	866131033548393	0	228
1562113350	866131033548393	0	228
1562113410	866131033548393	0	228
1562113470	866131033548393	0	228
1562113530	866131033548393	0	229
1562113590	866131033548393	0	228
1562113650	866131033548393	0	229
1562113710	866131033548393	0	228
1562113770	866131033548393	0	228
1562113830	866131033548393	0	229
1562113890	866131033548393	0	229
1562113950	866131033548393	0	228
1562114010	866131033548393	0	228
1562114070	866131033548393	0	228
1562114130	866131033548393	0	228
1562114190	866131033548393	0	228
1562114250	866131033548393	0	228
1562114310	866131033548393	0	228
1562114370	866131033548393	0	228
1562114430	866131033548393	0	228
1562114490	866131033548393	0	227
1562114550	866131033548393	0	228
1562114610	866131033548393	0	228
1562114670	866131033548393	0	228
1562114730	866131033548393	0	228
1562114790	866131033548393	0	228
1562114850	866131033548393	0	228
1562114910	866131033548393	0	228
1562114970	866131033548393	0	228
1562115030	866131033548393	0	228
1562115090	866131033548393	0	228
1562115150	866131033548393	0	228
1562115210	866131033548393	0	228
1562115270	866131033548393	0	226
1562115330	866131033548393	0	225
1562115390	866131033548393	0	225
1562115450	866131033548393	0	225
1562115510	866131033548393	0	226
1562115570	866131033548393	0	226
1562115630	866131033548393	0	226
1562115690	866131033548393	0	226
1562115750	866131033548393	0	226
1562115810	866131033548393	0	226
1562115870	866131033548393	0	226
1562115930	866131033548393	0	226
1562115990	866131033548393	0	226
1562116050	866131033548393	0	226
1562116110	866131033548393	0	226
1562116170	866131033548393	0	226
1562116230	866131033548393	0	226
1562116290	866131033548393	0	226
1562116350	866131033548393	0	226
1562116410	866131033548393	0	226
1562116470	866131033548393	0	226
1562116530	866131033548393	0	226
1562116590	866131033548393	0	226
1562116650	866131033548393	0	226
1562116710	866131033548393	0	226
1562116771	866131033548393	0	226
1562116831	866131033548393	0	226
1562116891	866131033548393	0	226
1562116951	866131033548393	0	226
1562117011	866131033548393	0	226
1562117071	866131033548393	0	225
1562117131	866131033548393	0	225
1562117191	866131033548393	0	225
1562117251	866131033548393	0	225
1562117311	866131033548393	0	225
1562117371	866131033548393	0	225
1562117431	866131033548393	0	225
1562117491	866131033548393	0	225
1562117551	866131033548393	0	225
1562117611	866131033548393	0	225
1562117671	866131033548393	0	225
1562117731	866131033548393	0	226
1562117791	866131033548393	0	226
1562117851	866131033548393	0	226
1562117911	866131033548393	0	226
1562117971	866131033548393	0	226
1562118031	866131033548393	0	226
1562118091	866131033548393	0	226
1562118151	866131033548393	0	226
1562118211	866131033548393	0	226
1562118271	866131033548393	0	226
1562118331	866131033548393	0	226
1562118391	866131033548393	0	226
1562118451	866131033548393	0	226
1562118511	866131033548393	0	226
1562118571	866131033548393	0	226
1562118631	866131033548393	0	226
1562118691	866131033548393	0	226
1562118751	866131033548393	0	226
1562118811	866131033548393	0	226
1562118871	866131033548393	0	226
1562118931	866131033548393	0	226
1562118991	866131033548393	0	226
1562119051	866131033548393	0	226
1562119111	866131033548393	0	226
1562119171	866131033548393	0	225
1562119231	866131033548393	0	225
1562119291	866131033548393	0	225
1562119351	866131033548393	0	225
1562119411	866131033548393	0	225
1562119471	866131033548393	0	225
1562119531	866131033548393	0	225
1562119591	866131033548393	0	225
1562119651	866131033548393	0	225
1562119711	866131033548393	0	225
1562119771	866131033548393	0	226
1562119831	866131033548393	0	226
1562119891	866131033548393	0	226
1562119951	866131033548393	0	226
1562120011	866131033548393	0	226
1562120071	866131033548393	0	226
1562120131	866131033548393	0	226
1562120191	866131033548393	0	226
1562120251	866131033548393	0	226
1562120311	866131033548393	0	226
1562120372	866131033548393	0	226
1562120432	866131033548393	0	226
1562120492	866131033548393	0	226
1562120552	866131033548393	0	226
1562120612	866131033548393	0	226
1562120672	866131033548393	0	226
1562120732	866131033548393	0	226
1562120792	866131033548393	0	226
1562120852	866131033548393	0	226
1562120912	866131033548393	0	226
1562120972	866131033548393	0	226
1562121032	866131033548393	0	226
1562121092	866131033548393	0	225
1562121152	866131033548393	0	225
1562121212	866131033548393	0	225
1562121272	866131033548393	0	225
1562121332	866131033548393	0	225
1562121392	866131033548393	0	225
1562121452	866131033548393	0	226
1562121512	866131033548393	0	226
1562121572	866131033548393	0	226
1562121632	866131033548393	0	226
1562121692	866131033548393	0	225
1562121752	866131033548393	0	226
1562121812	866131033548393	0	226
1562121872	866131033548393	0	227
1562121932	866131033548393	0	226
1562121992	866131033548393	0	226
1562122052	866131033548393	0	226
1562122112	866131033548393	0	226
1562122172	866131033548393	0	226
1562122232	866131033548393	0	227
1562122292	866131033548393	0	225
1562122352	866131033548393	0	226
1562122412	866131033548393	0	226
1562122472	866131033548393	0	226
1562122532	866131033548393	0	226
1562122592	866131033548393	0	226
1562122652	866131033548393	0	226
1562122712	866131033548393	0	226
1562122772	866131033548393	0	226
1562122832	866131033548393	0	226
1562122892	866131033548393	0	226
1562122952	866131033548393	0	226
1562123012	866131033548393	0	226
1562123072	866131033548393	0	226
1562123132	866131033548393	0	225
1562123192	866131033548393	0	225
1562123252	866131033548393	0	225
1562123312	866131033548393	0	226
1562123372	866131033548393	0	226
1562123432	866131033548393	0	226
1562123552	866131033548393	0	226
1562123612	866131033548393	0	226
1562123672	866131033548393	0	226
1562123732	866131033548393	0	227
1562123792	866131033548393	0	226
1562123852	866131033548393	0	226
1562123912	866131033548393	0	226
1562123973	866131033548393	0	226
1562124033	866131033548393	0	226
1562124093	866131033548393	0	226
1562124153	866131033548393	0	226
1562124213	866131033548393	0	226
1562124273	866131033548393	0	226
1562124333	866131033548393	0	227
1562124393	866131033548393	0	226
1562124453	866131033548393	0	226
1562124513	866131033548393	0	226
1562124573	866131033548393	0	226
1562124633	866131033548393	0	226
1562124693	866131033548393	0	226
1562124753	866131033548393	0	226
1562124813	866131033548393	0	226
1562124873	866131033548393	0	226
1562124933	866131033548393	0	226
1562124993	866131033548393	0	226
1562125053	866131033548393	0	226
1562125113	866131033548393	0	226
1562125173	866131033548393	0	226
1562125233	866131033548393	0	226
1562125293	866131033548393	0	226
1562125353	866131033548393	0	226
1562125413	866131033548393	0	226
1562125473	866131033548393	0	226
1562125533	866131033548393	0	227
1562125593	866131033548393	0	227
1562125653	866131033548393	0	227
1562125713	866131033548393	0	227
1562125773	866131033548393	0	227
1562125833	866131033548393	0	225
1562125893	866131033548393	0	227
1562125953	866131033548393	0	227
1562126013	866131033548393	0	227
1562126073	866131033548393	0	227
1562126133	866131033548393	0	227
1562126193	866131033548393	0	227
1562126253	866131033548393	0	227
1562126313	866131033548393	0	227
1562126373	866131033548393	0	227
1562126433	866131033548393	0	227
1562126493	866131033548393	0	227
1562126553	866131033548393	0	227
1562126613	866131033548393	0	227
1562126673	866131033548393	0	226
1562126733	866131033548393	0	226
1562126793	866131033548393	0	226
1562126853	866131033548393	0	227
1562126913	866131033548393	0	226
1562126973	866131033548393	0	226
1562127033	866131033548393	0	226
1562127093	866131033548393	0	226
1562127153	866131033548393	0	227
1562127213	866131033548393	0	227
1562127273	866131033548393	0	226
1562127333	866131033548393	0	226
1562127393	866131033548393	0	226
1562127453	866131033548393	0	226
1562127513	866131033548393	0	227
1562127574	866131033548393	0	227
1562127634	866131033548393	0	227
1562127694	866131033548393	0	226
1562127754	866131033548393	0	226
1562127814	866131033548393	0	227
1562127874	866131033548393	0	227
1562127934	866131033548393	0	227
1562127994	866131033548393	0	227
1562128054	866131033548393	0	227
1562128114	866131033548393	0	227
1562128174	866131033548393	0	227
1562128234	866131033548393	0	226
1562128294	866131033548393	0	226
1562128354	866131033548393	0	226
1562128414	866131033548393	0	226
1562128474	866131033548393	0	226
1562128534	866131033548393	0	226
1562128594	866131033548393	0	226
1562128654	866131033548393	0	226
1562128714	866131033548393	0	226
1562128774	866131033548393	0	226
1562128834	866131033548393	0	226
1562128894	866131033548393	0	226
1562128954	866131033548393	0	227
1562129014	866131033548393	0	227
1562129074	866131033548393	0	227
1562129134	866131033548393	0	227
1562129194	866131033548393	0	227
1562129254	866131033548393	0	227
1562129314	866131033548393	0	227
1562129374	866131033548393	0	227
1562129434	866131033548393	0	227
1562129494	866131033548393	0	227
1562129554	866131033548393	0	227
1562129614	866131033548393	0	227
1562129674	866131033548393	0	227
1562129734	866131033548393	0	227
1562129794	866131033548393	0	227
1562129854	866131033548393	0	227
1562129914	866131033548393	0	227
1562129974	866131033548393	0	227
1562130034	866131033548393	0	227
1562130094	866131033548393	0	226
1562130154	866131033548393	0	226
1562130214	866131033548393	0	226
1562130274	866131033548393	0	226
1562130334	866131033548393	0	226
1562130394	866131033548393	0	226
1562130454	866131033548393	0	226
1562130514	866131033548393	0	226
1562130574	866131033548393	0	226
1562130634	866131033548393	0	226
1562130694	866131033548393	0	226
1562130754	866131033548393	0	226
1562130814	866131033548393	0	226
1562130874	866131033548393	0	227
1562130934	866131033548393	0	227
1562130994	866131033548393	0	227
1562131054	866131033548393	0	227
1562131114	866131033548393	0	227
1562131175	866131033548393	0	227
1562131235	866131033548393	0	227
1562131295	866131033548393	0	227
1562131355	866131033548393	0	227
1562131415	866131033548393	0	227
1562131475	866131033548393	0	227
1562131535	866131033548393	0	228
1562131595	866131033548393	0	226
1562131655	866131033548393	0	227
1562131715	866131033548393	0	227
1562131775	866131033548393	0	227
1562131835	866131033548393	0	227
1562131895	866131033548393	0	227
1562131955	866131033548393	0	226
1562132015	866131033548393	0	226
1562132076	866131033548393	0	226
1562132136	866131033548393	0	226
1562132196	866131033548393	0	226
1562132256	866131033548393	0	226
1562132316	866131033548393	0	226
1562132376	866131033548393	0	226
1562132436	866131033548393	0	226
1562132496	866131033548393	0	226
1562132556	866131033548393	0	226
1562132616	866131033548393	0	226
1562132676	866131033548393	0	226
1562132736	866131033548393	0	226
1562132796	866131033548393	0	227
1562132856	866131033548393	0	227
1562132916	866131033548393	0	228
1562132976	866131033548393	0	227
1562133036	866131033548393	0	227
1562133096	866131033548393	0	227
1562133156	866131033548393	0	227
1562133216	866131033548393	0	227
1562133276	866131033548393	0	227
1562133336	866131033548393	0	228
1562133396	866131033548393	0	227
1562133456	866131033548393	0	227
1562133516	866131033548393	0	227
1562133576	866131033548393	0	227
1562133636	866131033548393	0	227
1562133696	866131033548393	0	227
1562133756	866131033548393	0	228
1562133816	866131033548393	0	228
1562133876	866131033548393	0	228
1562133936	866131033548393	0	227
1562133996	866131033548393	0	226
1562134056	866131033548393	0	226
1562134116	866131033548393	0	226
1562134176	866131033548393	0	226
1562134236	866131033548393	0	226
1562134296	866131033548393	0	226
1562134356	866131033548393	0	226
1562134416	866131033548393	0	226
1562134476	866131033548393	0	226
1562134536	866131033548393	0	226
1562134596	866131033548393	0	226
1562134656	866131033548393	0	226
1562134716	866131033548393	0	227
1562134777	866131033548393	0	227
1562134837	866131033548393	0	227
1562134897	866131033548393	0	227
1562134957	866131033548393	0	227
1562135017	866131033548393	0	227
1562135077	866131033548393	0	227
1562135137	866131033548393	0	227
1562135197	866131033548393	0	227
1562135257	866131033548393	0	227
1562135317	866131033548393	0	227
1562135377	866131033548393	0	227
1562135437	866131033548393	0	227
1562135497	866131033548393	0	227
1562135557	866131033548393	0	228
1562135617	866131033548393	0	228
1562135677	866131033548393	0	227
1562135737	866131033548393	0	227
1562135797	866131033548393	0	227
1562135857	866131033548393	0	226
1562135917	866131033548393	0	226
1562135977	866131033548393	0	226
1562136037	866131033548393	0	226
1562136097	866131033548393	0	226
1562136157	866131033548393	0	226
1562136217	866131033548393	0	226
1562136277	866131033548393	0	226
1562136337	866131033548393	0	226
1562136397	866131033548393	0	226
1562136457	866131033548393	0	226
1562136517	866131033548393	0	226
1562136577	866131033548393	0	226
1562136637	866131033548393	0	226
1562136697	866131033548393	0	227
1562136757	866131033548393	0	227
1562136817	866131033548393	0	227
1562136877	866131033548393	0	227
1562136937	866131033548393	0	227
1562136997	866131033548393	0	227
1562137057	866131033548393	0	227
1562137117	866131033548393	0	227
1562137177	866131033548393	0	227
1562137237	866131033548393	0	227
1562137297	866131033548393	0	227
1562137357	866131033548393	0	227
1562137417	866131033548393	0	227
1562137477	866131033548393	0	227
1562137537	866131033548393	0	227
1562137597	866131033548393	0	227
1562137657	866131033548393	0	227
1562137717	866131033548393	0	227
1562137777	866131033548393	0	228
1562137837	866131033548393	0	226
1562137897	866131033548393	0	226
1562137957	866131033548393	0	226
1562138017	866131033548393	0	226
1562138077	866131033548393	0	226
1562138137	866131033548393	0	226
1562138197	866131033548393	0	226
1562138257	866131033548393	0	226
1562138317	866131033548393	0	226
1562138459	866131033548393	0	223
1562138519	866131033548393	0	226
1562138579	866131033548393	0	226
1562138639	866131033548393	0	226
1562138699	866131033548393	0	226
1562138759	866131033548393	0	227
1562138819	866131033548393	0	227
1562138879	866131033548393	0	227
1562138939	866131033548393	0	227
1562138999	866131033548393	0	227
1562139059	866131033548393	0	227
1562139119	866131033548393	0	227
1562139179	866131033548393	0	227
1562139239	866131033548393	0	227
1562139299	866131033548393	0	227
1562139359	866131033548393	0	227
1562139419	866131033548393	0	227
1562139479	866131033548393	0	227
1562139539	866131033548393	0	227
1562139599	866131033548393	0	227
1562139659	866131033548393	0	226
1562139719	866131033548393	0	226
1562139779	866131033548393	0	226
1562139839	866131033548393	0	226
1562139899	866131033548393	0	226
1562139959	866131033548393	0	226
1562140019	866131033548393	0	226
1562140079	866131033548393	0	226
1562140139	866131033548393	0	226
1562140199	866131033548393	0	226
1562140259	866131033548393	0	226
1562140319	866131033548393	0	226
1562140379	866131033548393	0	226
1562140439	866131033548393	0	226
1562140499	866131033548393	0	226
1562140559	866131033548393	0	226
1562140619	866131033548393	0	227
1562140679	866131033548393	0	227
1562140739	866131033548393	0	227
1562140799	866131033548393	0	226
1562140859	866131033548393	0	226
1562140919	866131033548393	0	227
1562140979	866131033548393	0	227
1562141039	866131033548393	0	227
1562141099	866131033548393	0	227
1562141159	866131033548393	0	227
1562141219	866131033548393	0	227
1562141279	866131033548393	0	227
1562141339	866131033548393	0	227
1562141399	866131033548393	0	227
1562141459	866131033548393	0	227
1562141519	866131033548393	0	226
1562141579	866131033548393	0	226
1562141639	866131033548393	0	226
1562141699	866131033548393	0	226
1562141759	866131033548393	0	226
1562141819	866131033548393	0	226
1562141879	866131033548393	0	226
1562141939	866131033548393	0	226
1562141999	866131033548393	0	226
1562142060	866131033548393	0	226
1562142120	866131033548393	0	226
1562142180	866131033548393	0	226
1562142240	866131033548393	0	226
1562142300	866131033548393	0	226
1562142360	866131033548393	0	226
1562142420	866131033548393	0	226
1562142480	866131033548393	0	226
1562142540	866131033548393	0	226
1562142600	866131033548393	0	226
1562142660	866131033548393	0	226
1562142720	866131033548393	0	226
1562142780	866131033548393	0	226
1562142840	866131033548393	0	226
1562142900	866131033548393	0	226
1562142960	866131033548393	0	226
1562143020	866131033548393	0	226
1562143080	866131033548393	0	226
1562143140	866131033548393	0	226
1562143200	866131033548393	0	226
1562143344	866131033548393	0	223
1562143404	866131033548393	0	226
1562143464	866131033548393	0	226
1562143524	866131033548393	0	226
1562143584	866131033548393	0	226
1562143644	866131033548393	0	226
1562143704	866131033548393	0	226
1562143764	866131033548393	0	226
1562143824	866131033548393	0	226
1562143884	866131033548393	0	226
1562143944	866131033548393	0	226
1562144004	866131033548393	0	226
1562144064	866131033548393	0	226
1562144124	866131033548393	0	226
1562144184	866131033548393	0	226
1562144244	866131033548393	0	226
1562144304	866131033548393	0	226
1562144364	866131033548393	0	226
1562144424	866131033548393	0	226
1562144484	866131033548393	0	226
1562144544	866131033548393	0	226
1562144604	866131033548393	0	226
1562144664	866131033548393	0	226
1562144724	866131033548393	0	226
1562144784	866131033548393	0	226
1562144844	866131033548393	0	226
1562144904	866131033548393	0	226
1562144964	866131033548393	0	227
1562145024	866131033548393	0	227
1562145084	866131033548393	0	226
1562145144	866131033548393	0	226
1562145204	866131033548393	0	226
1562145264	866131033548393	0	226
1562145324	866131033548393	0	226
1562145384	866131033548393	0	226
1562145444	866131033548393	0	226
1562145504	866131033548393	0	226
1562145564	866131033548393	0	226
1562145624	866131033548393	0	226
1562145684	866131033548393	0	226
1562145744	866131033548393	0	226
1562145804	866131033548393	0	226
1562145864	866131033548393	0	226
1562145924	866131033548393	0	226
1562145984	866131033548393	0	226
1562146044	866131033548393	0	226
1562146104	866131033548393	0	225
1562146164	866131033548393	0	225
1562146224	866131033548393	0	226
1562146284	866131033548393	0	225
1562146344	866131033548393	0	225
1562146404	866131033548393	0	225
1562146464	866131033548393	0	225
1562146524	866131033548393	0	226
1562146584	866131033548393	0	225
1562146644	866131033548393	0	225
1562146704	866131033548393	0	225
1562146764	866131033548393	0	226
1562146824	866131033548393	0	226
1562146884	866131033548393	0	226
1562146945	866131033548393	0	225
1562147005	866131033548393	0	225
1562147065	866131033548393	0	225
1562147125	866131033548393	0	225
1562147185	866131033548393	0	225
1562147245	866131033548393	0	225
1562147305	866131033548393	0	225
1562147365	866131033548393	0	225
1562147425	866131033548393	0	225
1562147485	866131033548393	0	225
1562147545	866131033548393	0	224
1562147605	866131033548393	0	224
1562147665	866131033548393	0	224
1562147725	866131033548393	0	224
1562147785	866131033548393	0	224
1562147845	866131033548393	0	224
1562147905	866131033548393	0	224
1562147965	866131033548393	0	224
1562148025	866131033548393	0	224
1562148085	866131033548393	0	224
1562148145	866131033548393	0	224
1562148205	866131033548393	0	224
1562148265	866131033548393	0	224
1562148325	866131033548393	0	227
1562148385	866131033548393	0	227
1562148445	866131033548393	0	227
1562148505	866131033548393	0	226
1562148565	866131033548393	0	224
1562148625	866131033548393	0	225
1562148685	866131033548393	0	224
1562148745	866131033548393	0	224
1562148805	866131033548393	0	224
1562148865	866131033548393	0	224
1562148925	866131033548393	0	224
1562148985	866131033548393	0	224
1562149045	866131033548393	0	223
1562149105	866131033548393	0	226
1562149165	866131033548393	0	226
1562149225	866131033548393	0	226
1562149285	866131033548393	0	226
1562149345	866131033548393	0	226
1562149405	866131033548393	0	226
1562149465	866131033548393	0	226
1562149525	866131033548393	0	225
1562149585	866131033548393	0	225
1562149645	866131033548393	0	225
1562149705	866131033548393	0	225
1562149765	866131033548393	0	225
1562149825	866131033548393	0	225
1562149885	866131033548393	0	225
1562149945	866131033548393	0	226
1562150005	866131033548393	0	227
1562150065	866131033548393	0	225
1562150125	866131033548393	0	224
1562150185	866131033548393	0	224
1562150245	866131033548393	0	224
1562150305	866131033548393	0	225
1562150365	866131033548393	0	225
1562150425	866131033548393	0	225
1562150485	866131033548393	0	225
1562150546	866131033548393	0	225
1562150606	866131033548393	0	225
1562150666	866131033548393	0	225
1562150726	866131033548393	0	225
1562150786	866131033548393	0	225
1562150846	866131033548393	0	226
1562150906	866131033548393	0	226
1562150966	866131033548393	0	225
1562151026	866131033548393	0	225
1562151086	866131033548393	0	225
1562151146	866131033548393	0	226
1562151206	866131033548393	0	228
1562151266	866131033548393	0	225
1562151326	866131033548393	0	225
1562151386	866131033548393	0	225
1562151446	866131033548393	0	225
1562151506	866131033548393	0	225
1562151566	866131033548393	0	225
1562151626	866131033548393	0	225
1562151686	866131033548393	0	225
1562151746	866131033548393	0	224
1562151806	866131033548393	0	223
1562151866	866131033548393	0	223
1562151926	866131033548393	0	227
1562151986	866131033548393	0	225
1562152046	866131033548393	0	225
1562152106	866131033548393	0	225
1562152166	866131033548393	0	225
1562152226	866131033548393	0	224
1562152286	866131033548393	0	223
1562152346	866131033548393	0	224
1562152406	866131033548393	0	224
1562152466	866131033548393	0	224
1562152526	866131033548393	0	225
1562152586	866131033548393	0	224
1562152646	866131033548393	0	224
1562152706	866131033548393	0	224
1562152766	866131033548393	0	224
1562152826	866131033548393	0	224
1562152886	866131033548393	0	224
1562152946	866131033548393	0	224
1562153006	866131033548393	0	225
1562153066	866131033548393	0	227
1562153126	866131033548393	0	227
1562153186	866131033548393	0	227
1562153246	866131033548393	0	227
1562153306	866131033548393	0	227
1562153366	866131033548393	0	227
1562153426	866131033548393	0	227
1562153486	866131033548393	0	227
1562153546	866131033548393	0	227
1562153606	866131033548393	0	227
1562153666	866131033548393	0	225
1562153726	866131033548393	0	225
1562153786	866131033548393	0	225
1562153846	866131033548393	0	224
1562153906	866131033548393	0	223
1562153966	866131033548393	0	223
1562154026	866131033548393	0	223
1562154086	866131033548393	0	223
1562154147	866131033548393	0	223
1562154207	866131033548393	0	223
1562154267	866131033548393	0	224
1562154327	866131033548393	0	224
1562154387	866131033548393	0	224
1562154447	866131033548393	0	224
1562154507	866131033548393	0	223
1562154567	866131033548393	0	223
1562154627	866131033548393	0	223
1562154687	866131033548393	0	223
1562154747	866131033548393	0	224
1562154807	866131033548393	0	224
1562154867	866131033548393	0	224
1562154927	866131033548393	0	224
1562154987	866131033548393	0	224
1562155047	866131033548393	0	224
1562155107	866131033548393	0	223
1562155167	866131033548393	0	223
1562155227	866131033548393	0	223
1562155287	866131033548393	0	223
1562155347	866131033548393	0	224
1562155407	866131033548393	0	224
1562155467	866131033548393	0	227
1562155527	866131033548393	0	226
1562155587	866131033548393	0	226
1562155647	866131033548393	0	226
1562155707	866131033548393	0	226
1562155767	866131033548393	0	226
1562155827	866131033548393	0	226
1562155887	866131033548393	0	225
1562155947	866131033548393	0	226
1562156007	866131033548393	0	226
1562156067	866131033548393	0	226
1562156127	866131033548393	0	226
1562156187	866131033548393	0	226
1562156247	866131033548393	0	226
1562156307	866131033548393	0	226
1562156367	866131033548393	0	226
1562156427	866131033548393	0	226
1562156487	866131033548393	0	226
1562156547	866131033548393	0	226
1562156607	866131033548393	0	226
1562156667	866131033548393	0	226
1562156727	866131033548393	0	226
1562156787	866131033548393	0	226
1562156847	866131033548393	0	226
1562156907	866131033548393	0	226
1562156967	866131033548393	0	226
1562157027	866131033548393	0	226
1562157087	866131033548393	0	226
1562157147	866131033548393	0	226
1562157207	866131033548393	0	226
1562157267	866131033548393	0	226
1562157327	866131033548393	0	225
1562157387	866131033548393	0	225
1562157447	866131033548393	0	226
1562157507	866131033548393	0	226
1562157567	866131033548393	0	226
1562157627	866131033548393	0	226
1562157687	866131033548393	0	226
1562157748	866131033548393	0	226
1562157808	866131033548393	0	225
1562157868	866131033548393	0	226
1562157928	866131033548393	0	226
1562157988	866131033548393	0	226
1562158048	866131033548393	0	225
1562158108	866131033548393	0	225
1562158168	866131033548393	0	225
1562158228	866131033548393	0	225
1562158288	866131033548393	0	225
1562158348	866131033548393	0	225
1562158408	866131033548393	0	225
1562158468	866131033548393	0	225
1562158528	866131033548393	0	225
1562158588	866131033548393	0	225
1562158648	866131033548393	0	224
1562158708	866131033548393	0	224
1562158768	866131033548393	0	224
1562158828	866131033548393	0	224
1562158888	866131033548393	0	225
1562158948	866131033548393	0	226
1562159008	866131033548393	0	226
1562159068	866131033548393	0	226
1562159128	866131033548393	0	226
1562159188	866131033548393	0	227
1562159248	866131033548393	0	226
1562159308	866131033548393	0	225
1562159368	866131033548393	0	225
1562159428	866131033548393	0	225
1562159488	866131033548393	0	225
1562159548	866131033548393	0	225
1562159608	866131033548393	0	225
1562159668	866131033548393	0	225
1562159728	866131033548393	0	225
1562159788	866131033548393	0	225
1562159848	866131033548393	0	225
1562159908	866131033548393	0	225
1562160057	866131033548393	0	220
1562160117	866131033548393	0	223
1562160177	866131033548393	0	224
1562160237	866131033548393	0	224
1562160297	866131033548393	0	223
1562160357	866131033548393	0	223
1562160417	866131033548393	0	224
1562160477	866131033548393	0	224
1562160537	866131033548393	0	224
1562160597	866131033548393	0	223
1562160657	866131033548393	0	223
1562160797	866131033548393	0	220
1562160857	866131033548393	0	224
1562160917	866131033548393	0	223
1562160977	866131033548393	0	224
1562161037	866131033548393	0	225
1562161097	866131033548393	0	224
1562161157	866131033548393	0	225
1562161217	866131033548393	0	225
1562161463	866131033548393	0	225
1562161616	866131033548393	0	221
1562161676	866131033548393	0	225
1562161736	866131033548393	0	225
1562161796	866131033548393	0	225
1562161856	866131033548393	0	225
1562162014	866131033548393	0	220
1562162074	866131033548393	0	224
1562162134	866131033548393	0	224
1562162194	866131033548393	0	224
1562162254	866131033548393	0	223
1562162314	866131033548393	0	224
1562162374	866131033548393	0	224
1562162434	866131033548393	0	223
1562162494	866131033548393	0	223
1562162554	866131033548393	0	223
1562162614	866131033548393	0	223
1562162674	866131033548393	0	223
1562162734	866131033548393	0	223
1562162794	866131033548393	0	223
1562162854	866131033548393	0	225
1562162914	866131033548393	0	225
1562162974	866131033548393	0	225
1562163034	866131033548393	0	225
1562163094	866131033548393	0	225
1562163154	866131033548393	0	225
1562163214	866131033548393	0	225
1562163274	866131033548393	0	225
1562163334	866131033548393	0	225
1562163394	866131033548393	0	225
1562165735	866131033548393	0	225
1562165795	866131033548393	0	224
1562165855	866131033548393	0	223
1562165915	866131033548393	0	224
1562165975	866131033548393	0	224
1562166035	866131033548393	0	224
1562166095	866131033548393	0	223
1562166155	866131033548393	0	223
1562166215	866131033548393	0	224
1562166275	866131033548393	0	224
1562166335	866131033548393	0	224
1562166395	866131033548393	0	224
1562166455	866131033548393	0	224
1562166515	866131033548393	0	224
1562166575	866131033548393	0	224
1562166635	866131033548393	0	224
1562166695	866131033548393	0	224
1562166755	866131033548393	0	224
1562166815	866131033548393	0	224
1562166875	866131033548393	0	225
1562166935	866131033548393	0	225
1562166995	866131033548393	0	225
1562167055	866131033548393	0	225
1562167115	866131033548393	0	225
1562167175	866131033548393	0	225
1562167235	866131033548393	0	225
1562167295	866131033548393	0	225
1562167355	866131033548393	0	225
1562167415	866131033548393	0	225
1562167475	866131033548393	0	225
1562167535	866131033548393	0	225
1562167595	866131033548393	0	225
1562167655	866131033548393	0	225
1562167715	866131033548393	0	225
1562167775	866131033548393	0	225
1562167835	866131033548393	0	223
1562167895	866131033548393	0	223
1562167961	866131033548393	0	0
1562168021	866131033548393	0	221
1562168081	866131033548393	0	224
1562168141	866131033548393	0	223
1562168201	866131033548393	0	223
1562168261	866131033548393	0	223
1562168321	866131033548393	0	224
1562168381	866131033548393	0	224
1562168441	866131033548393	0	223
1562168501	866131033548393	0	224
1562168561	866131033548393	0	224
1562168617	866131033548393	0	0
1562168803	866131033548393	0	221
1562168863	866131033548393	0	225
1562168923	866131033548393	0	225
1562168983	866131033548393	0	225
1562169043	866131033548393	0	225
1562169103	866131033548393	0	225
1562169163	866131033548393	0	225
1562169223	866131033548393	0	225
1562169283	866131033548393	0	225
1562169343	866131033548393	0	225
1562169403	866131033548393	0	225
1562169463	866131033548393	0	225
1562169523	866131033548393	0	225
1562169583	866131033548393	0	225
1562169643	866131033548393	0	224
1562169703	866131033548393	0	223
1562169763	866131033548393	0	223
1562169823	866131033548393	0	224
1562169883	866131033548393	0	224
1562169943	866131033548393	0	224
1562170003	866131033548393	0	223
1562170174	866131033548393	0	220
1562170399	866131033548393	0	220
1562170459	866131033548393	0	223
1562170519	866131033548393	0	223
1562170695	866131033548393	0	220
1562170755	866131033548393	0	224
1562171089	866131033548393	0	221
1562171149	866131033548393	0	225
1562171209	866131033548393	0	225
1562171269	866131033548393	0	225
1562171329	866131033548393	0	225
1562171389	866131033548393	0	225
1562171449	866131033548393	0	225
1562171509	866131033548393	0	225
1562171569	866131033548393	0	225
1562171629	866131033548393	0	224
1562171689	866131033548393	0	224
1562171749	866131033548393	0	223
1562171809	866131033548393	0	223
1562171869	866131033548393	0	223
1562171929	866131033548393	0	223
1562171989	866131033548393	0	224
1562172049	866131033548393	0	224
1562172109	866131033548393	0	224
1562172169	866131033548393	0	223
1562172229	866131033548393	0	223
1562172289	866131033548393	0	223
1562172349	866131033548393	0	223
1562172409	866131033548393	0	223
1562172469	866131033548393	0	223
1562172529	866131033548393	0	223
1562172589	866131033548393	0	224
1562172649	866131033548393	0	225
1562172709	866131033548393	0	225
1562172769	866131033548393	0	225
1562172829	866131033548393	0	225
1562172889	866131033548393	0	225
1562172949	866131033548393	0	225
1562173009	866131033548393	0	225
1562173069	866131033548393	0	225
1562173129	866131033548393	0	225
1562173189	866131033548393	0	225
1562173249	866131033548393	0	225
1562173309	866131033548393	0	225
1562173369	866131033548393	0	225
1562173429	866131033548393	0	225
1562173489	866131033548393	0	225
1562173549	866131033548393	0	225
1562173609	866131033548393	0	225
1562173669	866131033548393	0	225
1562173729	866131033548393	0	225
1562173789	866131033548393	0	225
1562173849	866131033548393	0	225
1562173909	866131033548393	0	225
1562173969	866131033548393	0	224
1562174029	866131033548393	0	224
1562174089	866131033548393	0	224
1562174150	866131033548393	0	225
1562174210	866131033548393	0	225
1562174270	866131033548393	0	225
1562174330	866131033548393	0	224
1562174390	866131033548393	0	224
1562174450	866131033548393	0	224
1562174510	866131033548393	0	224
1562174570	866131033548393	0	225
1562174630	866131033548393	0	225
1562174691	866131033548393	0	224
1562174751	866131033548393	0	224
1562174811	866131033548393	0	224
1562174871	866131033548393	0	224
1562174931	866131033548393	0	225
1562174991	866131033548393	0	225
1562175051	866131033548393	0	225
1562175111	866131033548393	0	224
1562175171	866131033548393	0	224
1562175231	866131033548393	0	224
1562175291	866131033548393	0	225
1562175351	866131033548393	0	225
1562175411	866131033548393	0	224
1562175471	866131033548393	0	224
1562175531	866131033548393	0	224
1562175591	866131033548393	0	224
1562175651	866131033548393	0	225
1562175711	866131033548393	0	225
1562175771	866131033548393	0	224
1562175831	866131033548393	0	224
1562175891	866131033548393	0	224
1562175951	866131033548393	0	224
1562176011	866131033548393	0	225
1562176071	866131033548393	0	225
1562176131	866131033548393	0	225
1562176191	866131033548393	0	225
1562176251	866131033548393	0	225
1562176311	866131033548393	0	225
1562176371	866131033548393	0	225
1562176431	866131033548393	0	225
1562176631	866131033548393	0	221
1562176691	866131033548393	0	224
1562176751	866131033548393	0	225
1562176811	866131033548393	0	225
1562176871	866131033548393	0	226
1562176931	866131033548393	0	226
1562176991	866131033548393	0	226
1562177051	866131033548393	0	226
1562177111	866131033548393	0	226
1562177171	866131033548393	0	225
1562177231	866131033548393	0	226
1562177291	866131033548393	0	226
1562177351	866131033548393	0	226
1562177411	866131033548393	0	226
1562177471	866131033548393	0	226
1562177531	866131033548393	0	226
1562177591	866131033548393	0	226
1562177651	866131033548393	0	226
1562177711	866131033548393	0	226
1562177771	866131033548393	0	224
1562177831	866131033548393	0	224
1562181910	866131033548393	0	0
1562181970	866131033548393	0	222
1562248916	866131033542636	0	220
1562249441	866131033542636	0	220
1562249501	866131033542636	0	224
1562249561	866131033542636	0	224
1562249621	866131033542636	0	224
1562249681	866131033542636	0	224
1562249741	866131033542636	0	224
1562249801	866131033542636	0	224
1562249861	866131033542636	0	224
1562250106	866131033542636	0	220
1562250166	866131033542636	0	224
1562250226	866131033542636	0	224
1562250286	866131033542636	0	224
1562250346	866131033542636	0	223
1562250406	866131033542636	0	223
1562250466	866131033542636	0	223
1562250526	866131033542636	0	223
1562250586	866131033542636	0	223
1562250646	866131033542636	0	223
1562250706	866131033542636	0	223
1562250766	866131033542636	0	223
1562250826	866131033542636	0	223
1562250886	866131033542636	0	223
1562250946	866131033542636	0	223
1562251006	866131033542636	0	224
1562251066	866131033542636	0	223
1562251126	866131033542636	0	223
1562251186	866131033542636	0	223
1562251246	866131033542636	0	223
1562251306	866131033542636	0	223
1562251366	866131033542636	0	223
1562251426	866131033542636	0	223
1562251486	866131033542636	0	223
1562251546	866131033542636	0	223
1562251606	866131033542636	0	223
1562251666	866131033542636	0	223
1562251726	866131033542636	0	223
1562251786	866131033542636	0	223
1562251846	866131033542636	0	223
1562251906	866131033542636	0	223
1562251966	866131033542636	0	223
1562252026	866131033542636	0	224
1562252086	866131033542636	0	223
1562252146	866131033542636	0	223
1562252206	866131033542636	0	223
1562252266	866131033542636	0	224
1562252326	866131033542636	0	224
1562252386	866131033542636	0	224
1562252446	866131033542636	0	224
1562252506	866131033542636	0	224
1562252566	866131033542636	0	224
1562252626	866131033542636	0	224
1562252686	866131033542636	0	224
1562252746	866131033542636	0	224
1562252806	866131033542636	0	224
1562252866	866131033542636	0	224
1562252926	866131033542636	0	224
1562252987	866131033542636	0	224
1562253047	866131033542636	0	224
1562253107	866131033542636	0	224
1562253167	866131033542636	0	224
1562253227	866131033542636	0	224
1562253287	866131033542636	0	224
1562253347	866131033542636	0	224
1562253407	866131033542636	0	224
1562253467	866131033542636	0	224
1562253527	866131033542636	0	224
1562253587	866131033542636	0	224
1562253647	866131033542636	0	224
1562253708	866131033542636	0	224
1562253768	866131033542636	0	224
1562253828	866131033542636	0	223
1562253888	866131033542636	0	223
1562253948	866131033542636	0	223
1562254008	866131033542636	0	224
1562254068	866131033542636	0	224
1562254128	866131033542636	0	224
1562254188	866131033542636	0	223
1562254248	866131033542636	0	223
1562254308	866131033542636	0	224
1562254368	866131033542636	0	224
1562254428	866131033542636	0	223
1562254488	866131033542636	0	223
1562254548	866131033542636	0	223
1562254608	866131033542636	0	224
1562254668	866131033542636	0	224
1562254728	866131033542636	0	224
1562254788	866131033542636	0	224
1562254848	866131033542636	0	224
1562254908	866131033542636	0	224
1562254968	866131033542636	0	224
1562255028	866131033542636	0	225
1562255088	866131033542636	0	224
1562255148	866131033542636	0	224
1562255208	866131033542636	0	224
1562255268	866131033542636	0	224
1562255328	866131033542636	0	225
1562255388	866131033542636	0	225
1562255448	866131033542636	0	224
1562255508	866131033542636	0	224
1562255568	866131033542636	0	224
1562255628	866131033542636	0	224
1562255688	866131033542636	0	223
1562255748	866131033542636	0	223
1562255808	866131033542636	0	223
1562255868	866131033542636	0	223
1562255928	866131033542636	0	223
1562255988	866131033542636	0	223
1562256048	866131033542636	0	223
1562256108	866131033542636	0	223
1562256168	866131033542636	0	223
1562256228	866131033542636	0	223
1562256288	866131033542636	0	223
1562256348	866131033542636	0	223
1562256408	866131033542636	0	223
1562256468	866131033542636	0	223
1562256528	866131033542636	0	223
1562256588	866131033542636	0	223
1562256648	866131033542636	0	223
1562256708	866131033542636	0	223
1562256768	866131033542636	0	224
1562256828	866131033542636	0	223
1562256888	866131033542636	0	223
1562256948	866131033542636	0	223
1562257008	866131033542636	0	223
1562257068	866131033542636	0	224
1562257128	866131033542636	0	224
1562257188	866131033542636	0	224
1562257248	866131033542636	0	223
1562257309	866131033542636	0	223
1562257369	866131033542636	0	223
1562257429	866131033542636	0	224
1562257489	866131033542636	0	224
1562257549	866131033542636	0	224
1562257609	866131033542636	0	223
1562257669	866131033542636	0	223
1562257729	866131033542636	0	223
1562257789	866131033542636	0	223
1562257849	866131033542636	0	223
1562257909	866131033542636	0	223
1562257969	866131033542636	0	223
1562258029	866131033542636	0	223
1562258089	866131033542636	0	223
1562258149	866131033542636	0	223
1562258209	866131033542636	0	223
1562258269	866131033542636	0	223
1562258329	866131033542636	0	223
1562258389	866131033542636	0	223
1562258449	866131033542636	0	223
1562258509	866131033542636	0	223
1562258569	866131033542636	0	222
1562258629	866131033542636	0	223
1562258689	866131033542636	0	223
1562258749	866131033542636	0	223
1562258809	866131033542636	0	224
1562258869	866131033542636	0	225
1562258929	866131033542636	0	225
1562258989	866131033542636	0	224
1562259049	866131033542636	0	224
1562259109	866131033542636	0	224
1562259169	866131033542636	0	224
1562259229	866131033542636	0	224
1562259289	866131033542636	0	224
1562259349	866131033542636	0	224
1562259409	866131033542636	0	224
1562259469	866131033542636	0	225
1562259529	866131033542636	0	226
1562259589	866131033542636	0	226
1562259649	866131033542636	0	226
1562259709	866131033542636	0	225
1562259769	866131033542636	0	226
1562259829	866131033542636	0	226
1562259889	866131033542636	0	224
1562259949	866131033542636	0	223
1562260009	866131033542636	0	223
1562260069	866131033542636	0	223
1562260129	866131033542636	0	223
1562260189	866131033542636	0	223
1562260249	866131033542636	0	223
1562260309	866131033542636	0	223
1562260369	866131033542636	0	223
1562260429	866131033542636	0	223
1562260489	866131033542636	0	223
1562260549	866131033542636	0	224
1562260609	866131033542636	0	223
1562260669	866131033542636	0	223
1562260729	866131033542636	0	223
1562260789	866131033542636	0	224
1562260849	866131033542636	0	224
1562260913	866131033542636	0	0
1562260973	866131033542636	0	221
1562261033	866131033542636	0	223
1562261093	866131033542636	0	224
1562261153	866131033542636	0	224
1562261213	866131033542636	0	224
1562261273	866131033542636	0	223
1562261333	866131033542636	0	223
1562261393	866131033542636	0	223
1562261453	866131033542636	0	224
1562261513	866131033542636	0	223
1562261573	866131033542636	0	223
1562261633	866131033542636	0	223
1562261693	866131033542636	0	223
1562261753	866131033542636	0	223
1562261813	866131033542636	0	223
1562261873	866131033542636	0	223
1562261933	866131033542636	0	223
1562261993	866131033542636	0	223
1562262053	866131033542636	0	223
1562262113	866131033542636	0	223
1562262173	866131033542636	0	223
1562262233	866131033542636	0	223
1562262293	866131033542636	0	224
1562262353	866131033542636	0	224
1562262413	866131033542636	0	224
1562262473	866131033542636	0	224
1562262533	866131033542636	0	223
1562262593	866131033542636	0	223
1562262653	866131033542636	0	224
1562262713	866131033542636	0	224
1562262773	866131033542636	0	224
1562262833	866131033542636	0	223
1562262893	866131033542636	0	223
1562262953	866131033542636	0	223
1562263013	866131033542636	0	223
1562263073	866131033542636	0	223
1562263133	866131033542636	0	223
1562263193	866131033542636	0	223
1562263253	866131033542636	0	223
1562263313	866131033542636	0	223
1562263373	866131033542636	0	223
1562263433	866131033542636	0	223
1562263493	866131033542636	0	223
1562263553	866131033542636	0	223
1562263613	866131033542636	0	223
1562263673	866131033542636	0	223
1562263733	866131033542636	0	223
1562263793	866131033542636	0	223
1562263853	866131033542636	0	223
1562263913	866131033542636	0	223
1562263973	866131033542636	0	223
1562264033	866131033542636	0	223
1562264093	866131033542636	0	223
1562264153	866131033542636	0	224
1562264213	866131033542636	0	224
1562264273	866131033542636	0	224
1562264333	866131033542636	0	224
1562264393	866131033542636	0	224
1562264453	866131033542636	0	224
1562264514	866131033542636	0	224
1562264574	866131033542636	0	224
1562264634	866131033542636	0	224
1562264694	866131033542636	0	224
1562264754	866131033542636	0	224
1562264814	866131033542636	0	224
1562264874	866131033542636	0	223
1562264934	866131033542636	0	224
1562264994	866131033542636	0	224
1562265054	866131033542636	0	224
1562265114	866131033542636	0	224
1562265174	866131033542636	0	223
1562265234	866131033542636	0	223
1562265294	866131033542636	0	223
1562265354	866131033542636	0	223
1562265414	866131033542636	0	223
1562265474	866131033542636	0	223
1562265534	866131033542636	0	223
1562265594	866131033542636	0	223
1562265654	866131033542636	0	223
1562265714	866131033542636	0	223
1562265774	866131033542636	0	223
1562265834	866131033542636	0	223
1562265894	866131033542636	0	223
1562265954	866131033542636	0	224
1562266014	866131033542636	0	224
1562266074	866131033542636	0	224
1562266134	866131033542636	0	224
1562266194	866131033542636	0	224
1562266254	866131033542636	0	224
1562266314	866131033542636	0	224
1562266374	866131033542636	0	224
1562266434	866131033542636	0	224
1562266494	866131033542636	0	224
1562266554	866131033542636	0	224
1562266614	866131033542636	0	224
1562266674	866131033542636	0	224
1562266734	866131033542636	0	224
1562266794	866131033542636	0	224
1562266854	866131033542636	0	224
1562266914	866131033542636	0	224
1562266974	866131033542636	0	224
1562267034	866131033542636	0	224
1562267094	866131033542636	0	224
1562267154	866131033542636	0	224
1562267214	866131033542636	0	224
1562267274	866131033542636	0	223
1562267334	866131033542636	0	223
1562267394	866131033542636	0	223
1562267454	866131033542636	0	223
1562267514	866131033542636	0	223
1562267574	866131033542636	0	223
1562267634	866131033542636	0	223
1562267694	866131033542636	0	223
1562267754	866131033542636	0	223
1562267814	866131033542636	0	223
1562267874	866131033542636	0	223
1562267934	866131033542636	0	224
1562267994	866131033542636	0	224
1562268054	866131033542636	0	224
1562268115	866131033542636	0	224
1562268175	866131033542636	0	224
1562268235	866131033542636	0	224
1562268295	866131033542636	0	224
1562268355	866131033542636	0	224
1562268415	866131033542636	0	224
1562268475	866131033542636	0	224
1562268535	866131033542636	0	224
1562268595	866131033542636	0	224
1562268655	866131033542636	0	224
1562268715	866131033542636	0	224
1562268775	866131033542636	0	224
1562268835	866131033542636	0	224
1562268895	866131033542636	0	224
1562269478	866131033542636	0	221
1562269946	866131033542636	0	0
1562269958	866131033548393	0	0
1562270006	866131033542636	0	222
1562270018	866131033548393	0	223
1562270066	866131033542636	0	224
1562270078	866131033548393	0	226
1562270126	866131033542636	0	224
1562270138	866131033548393	0	226
1562270186	866131033542636	0	224
1562270198	866131033548393	0	226
1562270246	866131033542636	0	225
1562270258	866131033548393	0	226
1562270306	866131033542636	0	225
1562270318	866131033548393	0	226
1562270366	866131033542636	0	225
1562270378	866131033548393	0	226
1562270426	866131033542636	0	225
1562270438	866131033548393	0	226
1562270486	866131033542636	0	225
1562270498	866131033548393	0	226
1562270546	866131033542636	0	225
1562270558	866131033548393	0	226
1562270606	866131033542636	0	225
1562270618	866131033548393	0	226
1562270666	866131033542636	0	225
1562270678	866131033548393	0	226
1562270726	866131033542636	0	225
1562270738	866131033548393	0	226
1562270786	866131033542636	0	225
1562270798	866131033548393	0	226
1562270846	866131033542636	0	225
1562270858	866131033548393	0	226
1562270906	866131033542636	0	225
1562270918	866131033548393	0	226
1562270966	866131033542636	0	224
1562270978	866131033548393	0	226
1562271026	866131033542636	0	224
1562271038	866131033548393	0	225
1562271086	866131033542636	0	224
1562271098	866131033548393	0	225
1562271091	866873020621168	0	0
1562271146	866131033542636	0	224
1562271158	866131033548393	0	225
1562271151	866873020621168	0	222
1562271206	866131033542636	0	224
1562271218	866131033548393	0	225
1562271211	866873020621168	0	225
1562271266	866131033542636	0	224
1562271278	866131033548393	0	225
1562271326	866131033542636	0	224
1562271338	866131033548393	0	225
1562271386	866131033542636	0	224
1562271398	866131033548393	0	225
1562271446	866131033542636	0	224
1562271458	866131033548393	0	225
1562271506	866131033542636	0	224
1562271518	866131033548393	0	225
1562271566	866131033542636	0	224
1562271578	866131033548393	0	225
1562271626	866131033542636	0	224
1562271638	866131033548393	0	225
1562271686	866131033542636	0	224
1562271698	866131033548393	0	226
1562271746	866131033542636	0	225
1562271764	866131033548393	0	0
1562271806	866131033542636	0	224
1562271823	866131033548393	0	223
1562271866	866131033542636	0	224
1562271883	866131033548393	0	226
1562271864	866873020621168	0	0
1562271926	866131033542636	0	224
1562271943	866131033548393	0	226
1562271924	866873020621168	0	223
1562271986	866131033542636	0	224
1562271984	866873020621168	0	226
1562272044	866873020621168	0	226
1562272104	866873020621168	0	226
1562272221	866873020621168	0	0
1562272281	866873020621168	0	223
1562272341	866873020621168	0	226
1562272401	866873020621168	0	226
1562272461	866873020621168	0	226
1562272521	866873020621168	0	226
1562272581	866873020621168	0	226
1562272641	866873020621168	0	226
1562272701	866873020621168	0	225
1562272761	866873020621168	0	225
1562272818	866131033548393	0	0
1562272821	866873020621168	0	225
1562272878	866131033548393	0	222
1562272881	866873020621168	0	224
1562272934	866131033542636	0	0
1562272938	866131033548393	0	225
1562272941	866873020621168	0	224
1562272994	866131033542636	29	221
1562272998	866131033548393	0	225
1562273001	866873020621168	0	225
1562273054	866131033542636	0	224
1562273058	866131033548393	0	225
1562273061	866873020621168	0	225
1562273114	866131033542636	0	224
1562273118	866131033548393	0	225
1562273121	866873020621168	0	225
1562273174	866131033542636	0	224
1562273178	866131033548393	0	225
1562273181	866873020621168	0	224
1562273234	866131033542636	0	224
1562273238	866131033548393	0	225
1562273241	866873020621168	0	224
1562273294	866131033542636	0	223
1562273298	866131033548393	0	225
1562273301	866873020621168	0	224
1562273354	866131033542636	0	223
1562273358	866131033548393	0	225
1562273361	866873020621168	0	224
1562273414	866131033542636	0	224
1562273418	866131033548393	0	225
1562273421	866873020621168	0	224
1562273474	866131033542636	0	224
1562273478	866131033548393	0	225
1562273481	866873020621168	0	224
1562273534	866131033542636	0	224
1562273538	866131033548393	0	226
1562273541	866873020621168	0	225
1562273594	866131033542636	0	224
1562273598	866131033548393	0	226
1562273601	866873020621168	0	225
1562273654	866131033542636	0	224
1562273658	866131033548393	0	225
1562273661	866873020621168	0	225
1562273714	866131033542636	0	224
1562273718	866131033548393	0	226
1562273721	866873020621168	0	225
1562273774	866131033542636	0	224
1562273778	866131033548393	0	226
1562273781	866873020621168	0	226
1562273834	866131033542636	0	224
1562273838	866131033548393	0	226
1562273841	866873020621168	0	226
1562273894	866131033542636	0	224
1562273898	866131033548393	0	226
1562273901	866873020621168	0	226
1562273954	866131033542636	0	224
1562273958	866131033548393	0	226
1562273961	866873020621168	0	226
1562274014	866131033542636	0	224
1562274018	866131033548393	0	226
1562274021	866873020621168	0	226
1562274074	866131033542636	0	224
1562274078	866131033548393	0	226
1562274081	866873020621168	0	226
1562274146	866131033542636	0	0
1562274138	866131033548393	0	226
1562274141	866873020621168	0	226
1562274206	866131033542636	0	222
1562274198	866131033548393	0	226
1562274201	866873020621168	0	226
1562274266	866131033542636	0	224
1562274258	866131033548393	0	226
1562274261	866873020621168	0	226
1562274326	866131033542636	0	224
1562274318	866131033548393	0	226
1562274321	866873020621168	0	226
1562274386	866131033542636	0	225
1562274378	866131033548393	0	226
1562274381	866873020621168	0	226
1562274446	866131033542636	0	224
1562274438	866131033548393	0	226
1562274441	866873020621168	0	226
1562274506	866131033542636	0	225
1562274498	866131033548393	0	226
1562274501	866873020621168	0	226
1562274566	866131033542636	0	225
1562274558	866131033548393	0	226
1562274561	866873020621168	0	226
1562274626	866131033542636	0	224
1562274618	866131033548393	0	226
1562274621	866873020621168	0	226
1562274686	866131033542636	0	223
1562274678	866131033548393	0	225
1562274681	866873020621168	0	224
1562274746	866131033542636	0	224
1562274738	866131033548393	0	225
1562274741	866873020621168	0	224
1562274806	866131033542636	0	224
1562274798	866131033548393	0	225
1562274801	866873020621168	0	224
1562274866	866131033542636	0	224
1562274858	866131033548393	0	225
1562274861	866873020621168	0	225
1562274926	866131033542636	0	224
1562274918	866131033548393	0	225
1562274921	866873020621168	0	225
1562274986	866131033542636	0	224
1562274978	866131033548393	0	225
1562274981	866873020621168	0	225
1562275046	866131033542636	0	224
1562275038	866131033548393	0	225
1562275041	866873020621168	0	225
1562275106	866131033542636	0	224
1562275098	866131033548393	0	225
1562275101	866873020621168	0	225
1562275166	866131033542636	0	224
1562275158	866131033548393	0	225
1562275161	866873020621168	0	225
1562275226	866131033542636	0	224
1562275221	866873020621168	0	225
1562275286	866131033542636	0	224
1562275279	866131033548393	0	0
1562275281	866873020621168	0	225
1562275357	866131033542636	0	0
1562275339	866131033548393	0	223
1562275341	866873020621168	0	225
1562275417	866131033542636	0	222
1562275399	866131033548393	0	225
1562275401	866873020621168	0	225
1562275477	866131033542636	0	225
1562275459	866131033548393	0	226
1562275461	866873020621168	0	226
1562275537	866131033542636	0	225
1562275519	866131033548393	0	226
1562275521	866873020621168	0	226
1562275597	866131033542636	0	225
1562275579	866131033548393	0	226
1562275581	866873020621168	0	226
1562275657	866131033542636	0	225
1562275639	866131033548393	0	226
1562275641	866873020621168	0	226
1562275717	866131033542636	0	225
1562275699	866131033548393	0	226
1562275702	866873020621168	0	226
1562275777	866131033542636	0	225
1562275759	866131033548393	0	226
1562275762	866873020621168	0	226
1562275837	866131033542636	0	225
1562275819	866131033548393	0	226
1562275823	866873020621168	0	226
1562275897	866131033542636	0	225
1562275879	866131033548393	0	227
1562275883	866873020621168	0	226
1562275957	866131033542636	0	225
1562275939	866131033548393	0	227
1562275943	866873020621168	0	226
1562276017	866131033542636	0	225
1562275999	866131033548393	0	227
1562276003	866873020621168	0	226
1562276077	866131033542636	0	225
1562276059	866131033548393	0	226
1562276063	866873020621168	0	226
1562276137	866131033542636	0	225
1562276119	866131033548393	0	226
1562276123	866873020621168	0	226
1562276197	866131033542636	0	225
1562276179	866131033548393	0	226
1562276183	866873020621168	0	226
1562276257	866131033542636	0	225
1562276239	866131033548393	0	226
1562276243	866873020621168	0	226
1562276317	866131033542636	0	225
1562276303	866873020621168	0	226
1562276377	866131033542636	0	225
1562276363	866873020621168	0	226
1562276437	866131033542636	0	225
1562276423	866873020621168	0	226
1562276497	866131033542636	0	225
1562276483	866873020621168	0	226
1562276557	866131033542636	0	224
1562276543	866873020621168	0	225
1562276617	866131033542636	0	224
1562276603	866873020621168	0	225
1562276677	866131033542636	0	224
1562276663	866873020621168	0	225
1562276737	866131033542636	0	224
1562276723	866873020621168	0	225
1562276797	866131033542636	0	224
1562276783	866873020621168	0	225
1562276857	866131033542636	0	224
1562276843	866873020621168	0	225
1562276917	866131033542636	0	224
1562276903	866873020621168	0	225
1562276977	866131033542636	0	224
1562276963	866873020621168	0	225
1562277037	866131033542636	0	224
1562277023	866873020621168	0	225
1562277097	866131033542636	0	224
1562277083	866873020621168	0	225
1562277157	866131033542636	0	224
1562277143	866873020621168	0	225
1562277217	866131033542636	0	224
1562277203	866873020621168	0	225
1562277277	866131033542636	0	224
1562277263	866873020621168	0	225
1562277337	866131033542636	0	224
1562277323	866873020621168	0	225
1562277397	866131033542636	0	225
1562277383	866873020621168	0	226
1562277457	866131033542636	0	225
1562277443	866873020621168	0	226
1562277517	866131033542636	0	225
1562277503	866873020621168	0	226
1562277577	866131033542636	0	225
1562277563	866873020621168	0	226
1562277637	866131033542636	0	225
1562277623	866873020621168	0	226
1562277697	866131033542636	0	225
1562277683	866873020621168	0	226
1562277757	866131033542636	0	225
1562277743	866873020621168	0	226
1562277817	866131033542636	0	225
1562277803	866873020621168	0	226
1562277877	866131033542636	0	225
1562277863	866873020621168	0	226
1562277937	866131033542636	0	225
1562277923	866873020621168	0	226
1562277997	866131033542636	0	225
1562277983	866873020621168	0	226
1562278057	866131033542636	0	225
1562278043	866873020621168	0	226
1562278117	866131033542636	0	225
1562278103	866873020621168	0	226
1562278177	866131033542636	0	225
1562278163	866873020621168	0	226
1562278237	866131033542636	0	225
1562278223	866873020621168	0	226
1562278297	866131033542636	0	225
1562278283	866873020621168	0	226
1562278357	866131033542636	0	225
1562278343	866873020621168	0	226
1562278417	866131033542636	0	225
1562278403	866873020621168	0	226
1562278477	866131033542636	0	225
1562278463	866873020621168	0	226
1562278537	866131033542636	0	225
1562278523	866873020621168	0	226
1562278597	866131033542636	0	225
1562278583	866873020621168	0	226
1562278657	866131033542636	0	225
1562278643	866873020621168	0	226
1562278717	866131033542636	0	225
1562278703	866873020621168	0	226
1562278777	866131033542636	0	225
1562278763	866873020621168	0	226
1562278837	866131033542636	0	224
1562278823	866873020621168	0	226
1562278897	866131033542636	0	224
1562278883	866873020621168	0	226
1562278958	866131033542636	0	225
1562278943	866873020621168	0	226
1562279018	866131033542636	0	225
1562279003	866873020621168	0	226
1562279078	866131033542636	0	225
1562279063	866873020621168	0	226
1562279138	866131033542636	0	225
1562279123	866873020621168	0	226
1562279198	866131033542636	0	225
1562279183	866873020621168	0	226
1562279258	866131033542636	0	224
1562279243	866873020621168	0	226
1562279318	866131033542636	0	225
1562279303	866873020621168	0	226
1562279378	866131033542636	0	225
1562279363	866873020621168	0	226
1562279438	866131033542636	0	225
1562279424	866873020621168	0	226
1562279498	866131033542636	0	225
1562279484	866873020621168	0	226
1562279558	866131033542636	0	225
1562279544	866873020621168	0	226
1562279618	866131033542636	0	224
1562279604	866873020621168	0	226
1562279678	866131033542636	0	225
1562279664	866873020621168	0	226
1562279738	866131033542636	0	225
1562279724	866873020621168	0	226
1562279798	866131033542636	0	225
1562279784	866873020621168	0	226
1562279858	866131033542636	0	225
1562279844	866873020621168	0	226
1562279918	866131033542636	0	225
1562279904	866873020621168	0	226
1562279978	866131033542636	0	225
1562279964	866873020621168	0	226
1562280038	866131033542636	0	225
1562280024	866873020621168	0	226
1562280098	866131033542636	0	225
1562280084	866873020621168	0	226
1562280158	866131033542636	0	225
1562280144	866873020621168	0	226
1562280218	866131033542636	0	225
1562280204	866873020621168	0	226
1562280278	866131033542636	0	225
1562280264	866873020621168	0	226
1562280338	866131033542636	0	225
1562280324	866873020621168	0	226
1562280398	866131033542636	0	225
1562280384	866873020621168	0	226
1562280458	866131033542636	0	225
1562280444	866873020621168	0	226
1562280518	866131033542636	0	225
1562280504	866873020621168	0	226
1562280578	866131033542636	0	225
1562280564	866873020621168	0	226
1562280638	866131033542636	0	225
1562280624	866873020621168	0	226
1562280698	866131033542636	0	225
1562280684	866873020621168	0	226
1562280758	866131033542636	0	225
1562280744	866873020621168	0	226
1562280818	866131033542636	0	224
1562280804	866873020621168	0	226
1562280878	866131033542636	0	224
1562280864	866873020621168	0	226
1562280938	866131033542636	0	224
1562280924	866873020621168	0	226
1562280998	866131033542636	0	224
1562280984	866873020621168	0	226
1562281058	866131033542636	0	225
1562281044	866873020621168	0	226
1562281118	866131033542636	0	225
1562281104	866873020621168	0	226
1562281178	866131033542636	0	225
1562281164	866873020621168	0	226
1562281238	866131033542636	0	225
1562281224	866873020621168	0	226
1562281298	866131033542636	0	224
1562281284	866873020621168	0	226
1562281358	866131033542636	0	224
1562281344	866873020621168	0	226
1562281418	866131033542636	0	225
1562281404	866873020621168	0	226
1562281478	866131033542636	0	225
1562281464	866873020621168	0	226
1562281538	866131033542636	0	225
1562281524	866873020621168	0	226
1562281598	866131033542636	0	225
1562281584	866873020621168	0	226
1562281658	866131033542636	0	225
1562281644	866873020621168	0	226
1562281718	866131033542636	0	225
1562281704	866873020621168	0	226
1562281778	866131033542636	0	225
1562281764	866873020621168	0	226
1562281838	866131033542636	0	225
1562281824	866873020621168	0	226
1562281898	866131033542636	0	225
1562281884	866873020621168	0	226
1562281958	866131033542636	0	225
1562281944	866873020621168	0	226
1562282018	866131033542636	0	225
1562282004	866873020621168	0	226
1562282078	866131033542636	0	225
1562282064	866873020621168	0	226
1562282138	866131033542636	0	225
1562282124	866873020621168	0	226
1562282198	866131033542636	0	225
1562282184	866873020621168	0	226
1562282258	866131033542636	0	225
1562282244	866873020621168	0	226
1562282318	866131033542636	0	225
1562282304	866873020621168	0	226
1562282378	866131033542636	0	225
1562282364	866873020621168	0	226
1562282438	866131033542636	0	225
1562282424	866873020621168	0	226
1562282498	866131033542636	0	224
1562282484	866873020621168	0	226
1562282559	866131033542636	0	224
1562282544	866873020621168	0	225
1562282619	866131033542636	0	224
1562282604	866873020621168	0	225
1562282679	866131033542636	0	224
1562282664	866873020621168	0	225
1562282739	866131033542636	0	224
1562282724	866873020621168	0	225
1562282799	866131033542636	0	224
1562282784	866873020621168	0	225
1562282859	866131033542636	0	224
1562282844	866873020621168	0	225
1562282919	866131033542636	0	224
1562282904	866873020621168	0	225
1562282979	866131033542636	0	224
1562282964	866873020621168	0	225
1562283039	866131033542636	0	224
1562283025	866873020621168	0	225
1562283099	866131033542636	0	224
1562283085	866873020621168	0	225
1562283159	866131033542636	0	224
1562283145	866873020621168	0	225
1562283219	866131033542636	0	224
1562283205	866873020621168	0	225
1562283279	866131033542636	0	225
[truncated: 8,000 more rows]
